# Supplementary material for: Two Single Nucleotide Polymorphisms in the Purinergic Receptor P2X7 Gene Are Associated with Disease Severity in Multiple Sclerosis
Source: MDPI journal article supplement (doi:10.3390/ijms232315381), 2022-12-06
Supplement: s1 [file s1]

Table S1: Genotype distribution in MS and healthy controls.

|                      |    | Patients  |           | Healthy Controls | p value |
|----------------------|----|-----------|-----------|------------------|---------|
|                      |    | SPMS N=34 | RRMS N=94 | N=189            |         |
|                      |    | N (%)     | N (%)     | N (%)            |         |
| rs1718119 Ala348Thr: | GG | 12 (35,3) | 35 (37,2) | 74 (39,2)        | 0,95    |
|                      | AG | 16 (47,1) | 44 (46,8) | 90 (47,6)        |         |
|                      | AA | 6 (17,6)  | 15 (16,0) | 25 (13,2)        |         |
| rs2230911 Thr357Ser: | CC | 32 (94,1) | 84 (89,3) | 167 (88,4)       | 0,61    |
|                      | CG | 2(5,9)    | 10 (10,6) | 23 (11,6)        |         |
| rs2230912 Gln464Arg: | AA | 25 (73,5) | 70(74,5)  | 132 (69,8)       | 0,88    |
|                      | AG | 9 (26,5)  | 21 (22,3) | 51 (27,0)        |         |
|                      | GG | 0         | 3 (3,2)   | 6 (3,2)          |         |
| rs3751143 Glu496Ala: | AA | 24 (70,6) | 55 (58,5) | 114 (60,3)       | 0,52    |
|                      | AC | 8 (23,5)  | 36 (38,3) | 70 (37,0)        |         |
|                      | CC | 2 (5,9)   | 3 (3,2)   | 5 (2,7)          |         |
| rs2836045 Arg307Gln: | GG | 33(97,1)  | 92 (97,9) | 187 (98,9)       | 0,63    |
|                      | AG | 1 (2,9)   | 2 (2,1)   | 2 (1,1)          |         |
